# Supplementary material for: α-Aryl substituted GdDOTA derivatives, the perfect contrast agents for MRI?
Source: Royal Society of Chemistry journal article supplement (doi:10.1039/d3cc05989h), 2024-01-01
Supplement: d3cc05989h1.pdf [file d3cc05989h1.pdf]

## Electronic Supplementary Information

for

### **$\alpha$ -Aryl Substituted GdDOTA Derivatives, the Perfect Contrast Agents for MRI?**

*Karley B. Maier*<sup>[a]</sup> 0000-0001-8573-2873

*Lauren N. Rust*<sup>[a]</sup> 0000-0001-8585-466X

*Fabio Carniato*<sup>[b]</sup> 0000-0002-6268-1687

*Mauro Botta*<sup>[b]</sup> 0000-0003-4192-355X

*Mark Woods*<sup>[a,c]</sup> 0000-0003-4890-7544

[a] Department of Chemistry, Portland State University, 1719 SW 10th Ave, Portland OR, 97201, USA

[b] Dipartimento di Scienze e Innovazione Tecnologica, Università del Piemonte Orientale "Amedeo Avogadro", I-15121 Alessandria, Italy

[c] Advanced Imaging Research Center, Oregon Health and Science University, 1381 SW Sam Jackson Park Road, Portland OR, 97239, USA

E-mail: [mark.woods@pdx.edu](mailto:mark.woods@pdx.edu) or [mauro.botta@uniupo.it](mailto:mauro.botta@uniupo.it)

## Table of Contents

|                                                                                                                                                                                                                                                                                                                                                                                                                                                                                                                                                                                          |           |
|------------------------------------------------------------------------------------------------------------------------------------------------------------------------------------------------------------------------------------------------------------------------------------------------------------------------------------------------------------------------------------------------------------------------------------------------------------------------------------------------------------------------------------------------------------------------------------------|-----------|
| <b>Figure S1.</b>                                                                                                                                                                                                                                                                                                                                                                                                                                                                                                                                                                        | <b>S3</b> |
| The temperature dependence of the $^{17}\text{O}$ NMR reduced transverse relaxation rate constant of solvent water of solutions of GdDOTFA (left) and GdDOTBA (right) at pH 6.6 and 11.7 T.                                                                                                                                                                                                                                                                                                                                                                                              |           |
| <b>Figure S2.</b>                                                                                                                                                                                                                                                                                                                                                                                                                                                                                                                                                                        | <b>S3</b> |
| Left: Relaxometric titration of human serum albumin into a 0.09 mM solution of GdDOTFA at 298 K and 0.47 T (red circles). For comparative purposes the effect on the relaxation rate constant of HSA (black diamonds) and GdDOTFA alone (open diamonds) are shown. Right: Relaxometric titration of human serum albumin into a 0.10 mM solution of GdDOBTA at 298 K and 0.47 T.                                                                                                                                                                                                          |           |
| <b>Figure S3.</b>                                                                                                                                                                                                                                                                                                                                                                                                                                                                                                                                                                        | <b>S4</b> |
| The NMRD profile of GdDOTFA in human serum (seronorm) recorded at 310 K and a total $[\text{Gd}] = 0.5$ mM (open red diamonds). The ordinate axis is not expressed in terms of relaxivity, but in terms of the paramagnetic effect on the relaxation rate constant of $^1\text{H}_2\text{O}$ without correction for concentration. For comparative purposes the NMRD profile of GdDOTFA in aqueous solution at 310 K at the same concentration is shown (closed blue diamonds). The concentration of GdDOTFA bound to HSA in serum is estimated to be in the range of 50 $\mu\text{M}$ . |           |
| <b>Figure S4.</b>                                                                                                                                                                                                                                                                                                                                                                                                                                                                                                                                                                        | <b>S5</b> |
| The structures of $\text{Gd}^{3+}$ chelates used as contrast agents that are either in clinical trials or already in clinical use. The relaxivities of these agents are shown in Figures 4 & 5. Coordinated water molecules are not shown, but these chelates are coordinatively saturated when $\text{CN}=9$ , the maximum number of coordinated water molecules can therefore be calculated by subtracting the denticity of the ligand from 9.                                                                                                                                         |           |
| <b>Figure S5.</b>                                                                                                                                                                                                                                                                                                                                                                                                                                                                                                                                                                        | <b>S6</b> |
| The calculated relaxivity, as function of the water exchange lifetime ( $\tau_{\text{M}}$ ), of a $\text{Gd}^{3+}$ chelate with electronic relaxation characteristics comparable to those of GdDOTA ( $\Delta^2 = 1.6 \times 10^{-19} \text{ s}^{-2}$ , $\tau_{\text{V}} = 7.7$ ps) if the rate of molecular tumbled had been slowed such that $\tau_{\text{R}} = 100$ ns (left) and $\tau_{\text{R}} = 2$ ns (right) at different magnetic field strengths. When $\tau_{\text{R}}$ is long, the value of $\tau_{\text{M}}$ is shorter at higher magnetic fields.                        |           |
| <b>Figure S6.</b>                                                                                                                                                                                                                                                                                                                                                                                                                                                                                                                                                                        | <b>S6</b> |
| The calculated relaxivity, as function of the water exchange lifetime ( $\tau_{\text{M}}$ ), of a $\text{Gd}^{3+}$ chelate with electronic relaxation characteristics comparable to those of GdDOTFA ( $\Delta^2 = 6.8 \times 10^{-18} \text{ s}^{-2}$ , $\tau_{\text{V}} = 25$ ps) if the rate of molecular tumbled had been slowed such that $\tau_{\text{R}} = 100$ ns (left) and $\tau_{\text{R}} =$                                                                                                                                                                                 |           |

2 ns (right) at different magnetic field strengths. The significance of optimizing electronic relaxation is evident when comparing with the relaxivity that achieved in Figure S3.

**Figure S7.**

**S7**

The water proton relaxation rate constant ( $R_1$ ) measured during incubation of a 0.42 mM solution of GdDOTFA (blue open circles) and a 0.46 mM solution of GdDOTA (black triangles) in 1M HCl at 298 K. Measured at 298 K and 32 MHz.

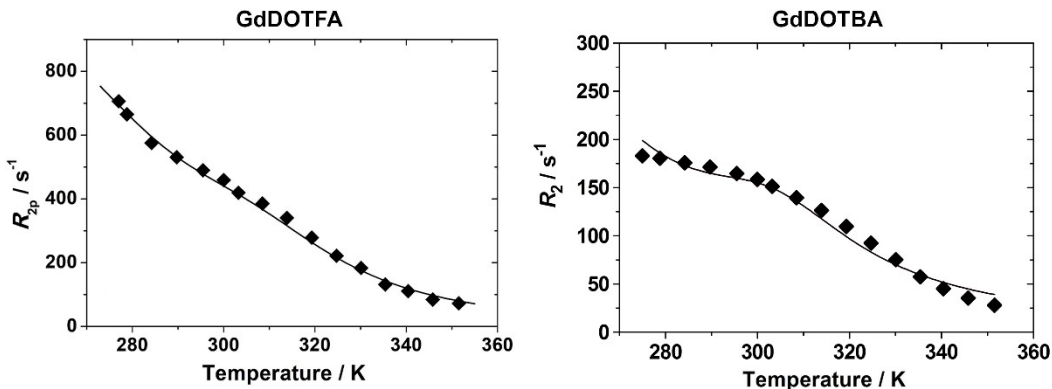

**Figure S1.** The temperature dependence of the  $^{17}\text{O}$  NMR reduced transverse relaxation rate constant of solvent water of solutions of GdDOTFA (left) and GdDOTBA (right) at pH 6.6 and 11.7 T.

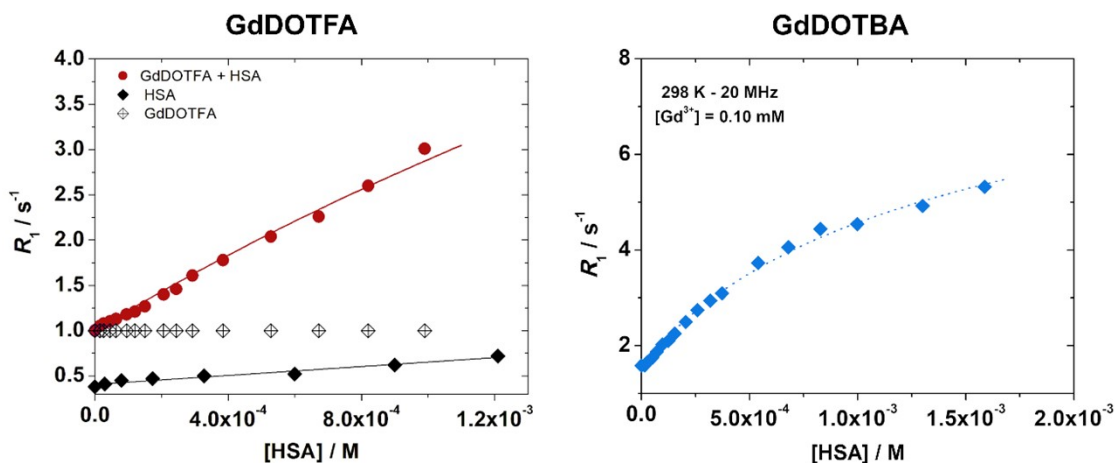

**Figure S2.** Left: Relaxometric titration of human serum albumin into a 0.09 mM solution of GdDOTFA at 298 K and 0.47 T (red circles). For comparative purposes the effect on the relaxation rate constant of HSA (black diamonds) and GdDOTFA alone (open diamonds) are shown. Right: Relaxometric titration of human serum albumin into a 0.10 mM solution of GdDOTBA at 298 K and 0.47 T.

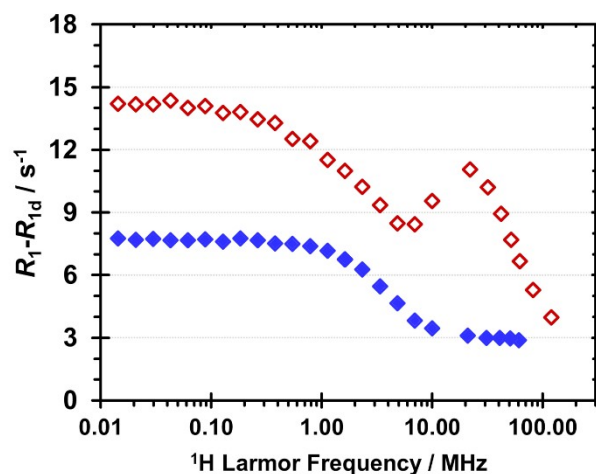

**Figure S3.** The NMRD profile of GdDOTFA in human serum (seronorm) recorded at 310 K and a total  $[\text{Gd}] = 0.5 \text{ mM}$  (open red diamonds). The ordinate axis is not expressed in terms of relaxivity, but in terms of the paramagnetic effect on the relaxation rate constant of  $^1\text{H}_2\text{O}$  without correction for concentration. For comparative purposes the NMRD profile of GdDOTFA in aqueous solution at 310 K at the same concentration is shown (closed blue diamonds). The concentration of GdDOTFA bound to HSA in serum is estimated to be in the range of  $50 \mu\text{M}$ .

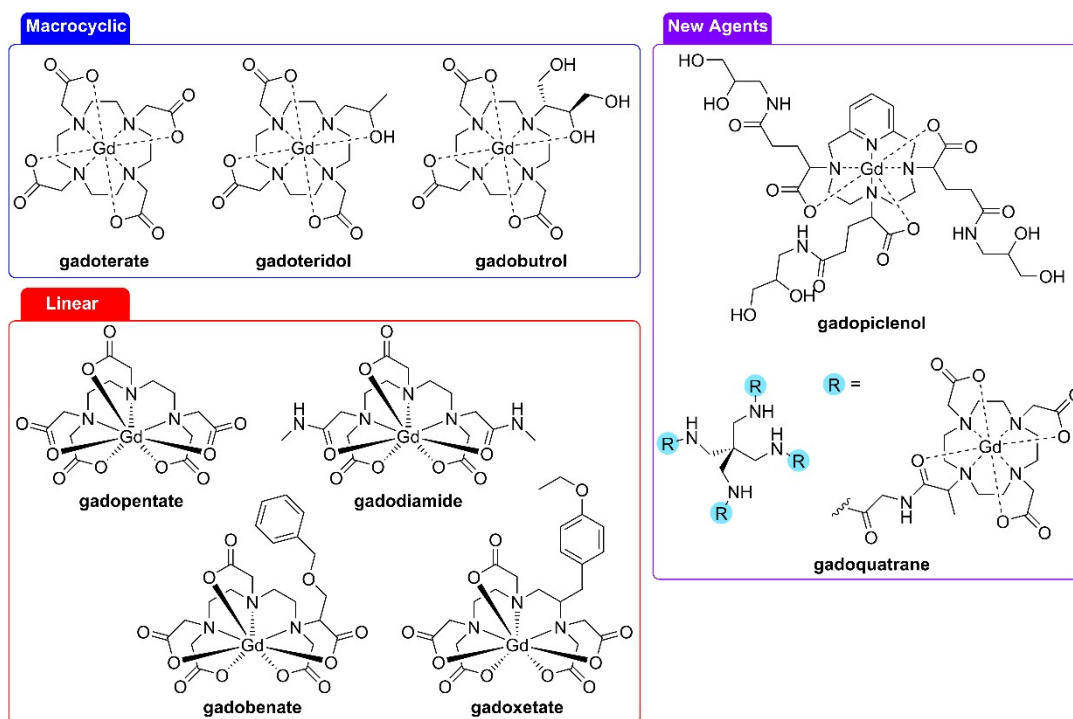

**Figure S4.** The structures of Gd<sup>3+</sup> chelates used as contrast agents that are either in clinical trials or already in clinical use. The relaxivities of these agents are shown in Figures 4 & 5. Coordinated water molecules are not shown, but these chelates are coordinatively saturated when CN=9, the maximum number of coordinated water molecules can therefore be calculated by subtracting the denticity of the ligand from 9.

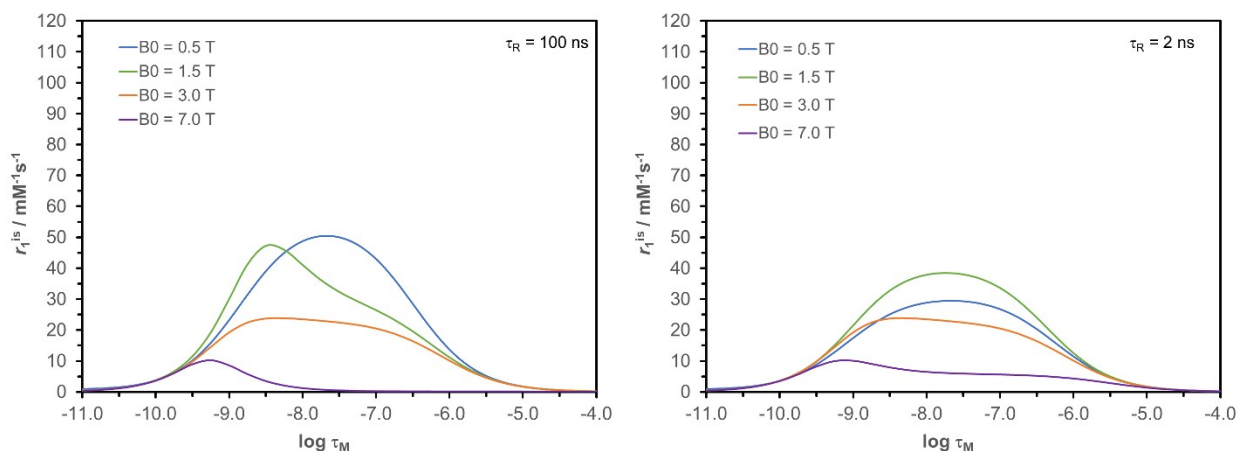

**Figure S5.** The calculated relaxivity, as function of the water exchange lifetime ( $\tau_M$ ), of a  $\text{Gd}^{3+}$  chelate with electronic relaxation characteristics comparable to those of GdDOTA ( $\Delta^2 = 1.6 \times 10^{-19} \text{ s}^{-2}$ ,  $\tau_V = 7.7 \text{ ps}$ ) if the rate of molecular tumbled had been slowed such that  $\tau_R = 100 \text{ ns}$  (left) and  $\tau_R = 2 \text{ ns}$  (right) at different magnetic field strengths. When  $\tau_R$  is long, the value of  $\tau_M$  is shorter at higher magnetic fields.

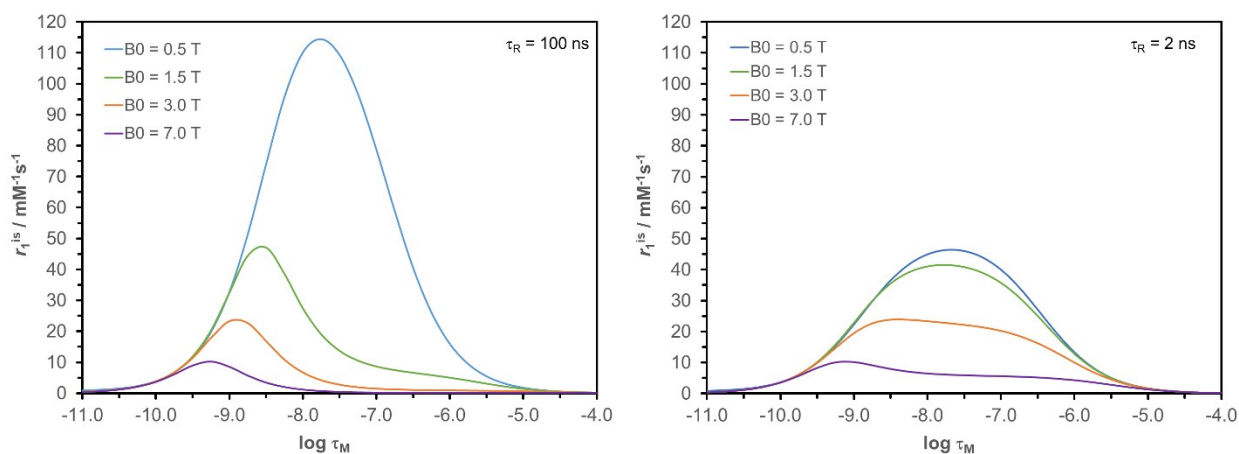

**Figure S6.** The calculated relaxivity, as function of the water exchange lifetime ( $\tau_M$ ), of a  $\text{Gd}^{3+}$  chelate with electronic relaxation characteristics comparable to those of GdDOTFA ( $\Delta^2 = 6.8 \times 10^{-18} \text{ s}^{-2}$ ,  $\tau_V = 25 \text{ ps}$ ) if the rate of molecular tumbled had been slowed such that  $\tau_R = 100 \text{ ns}$  (left) and  $\tau_R = 2 \text{ ns}$  (right) at different magnetic field strengths. The significance of optimizing electronic relaxation is evident when comparing with the relaxivity that achieved in Figure S3.

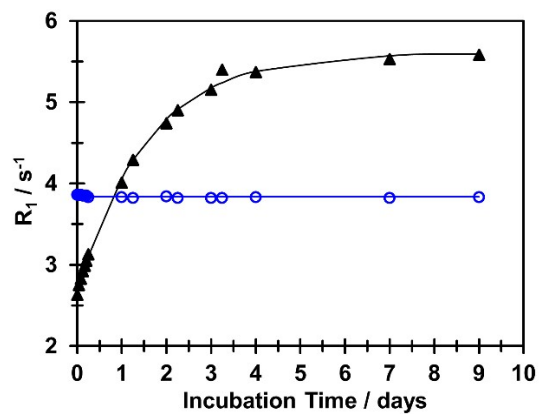

**Figure S7.** The water proton relaxation rate constant ( $R_1$ ) measured during incubation of a 0.42 mM solution of GdDOTFA (blue open circles) and a 0.46 mM solution of GdDOTA (black triangles) in 1M HCl at 298K. Measured at 298K and 32 MHz.
